# Supplementary material for: A portable acetylcholinesterase-based electrochemical sensor for field detection of organophosphorus
Source: Royal Society of Chemistry journal article supplement (doi:10.1039/d2ra05383g), 2023-01-01
Supplement: d2ra05383g2.pdf [file d2ra05383g2.pdf]

## Supplementary Material

### **A portable acetylcholinesterase-based electrochemical sensor for field detection of organophosphorus**

Long Wen <sup>a</sup>, Jianfang Wang <sup>\*a</sup>, Zhuoliang Liu, Cheng-an Tao, Jialing Rao, Jian Huang, and Yujiao Li

College of Science, National University of Defense Technology, Changsha 410073, P.R. China.

<sup>a</sup> The two authors contributed equally to this work.

\* Corresponding author: wangjianfang@nudt.edu.cn (J.W.)

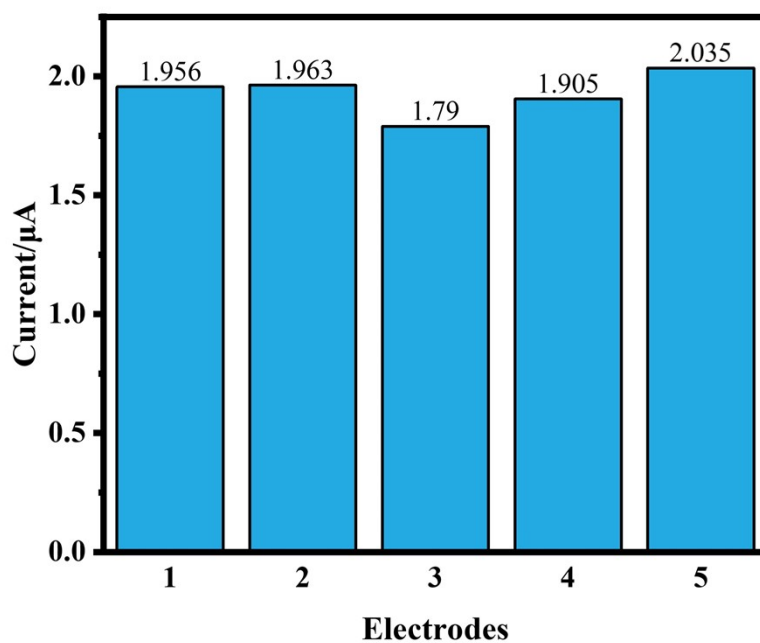

**Fig. S1. Repeatability study of SPCE/GR/AuNPs/AChE/Nafion sensors. Five SPCE/GR/AuNPs/AChE/Nafion sensors were prepared in the same way and then the sensor signals were measured after incubation with ICP at a concentration of 10ug/L.**

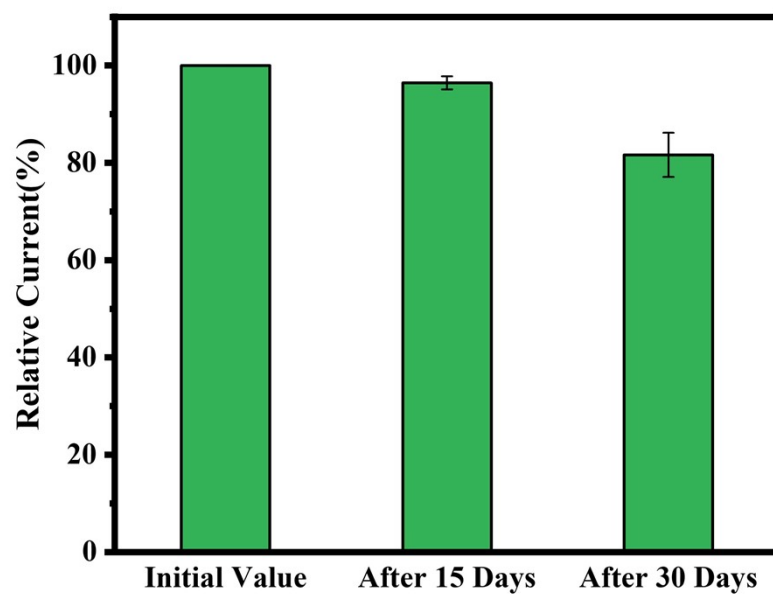

**Fig. S2. Stability study of SPCE/GR/AuNPs/AChE/Nafion sensors. Three groups of SPCE/GR/AuNPs/AChE/Nafion sensors (three per group) were prepared in the same way, and the initial signal, the signal after 15 days of dry storage in a 4°C refrigerator, and the signal after 30 days of dry storage in a 4°C refrigerator were measured.**
